# Supplementary material for: Computational Study on Potential Novel Anti-Ebola Virus Protein VP35 Natural Compounds
Source: MDPI journal article supplement (doi:10.3390/biomedicines9121796), 2021-11-30
Supplement: s1 [file s1]

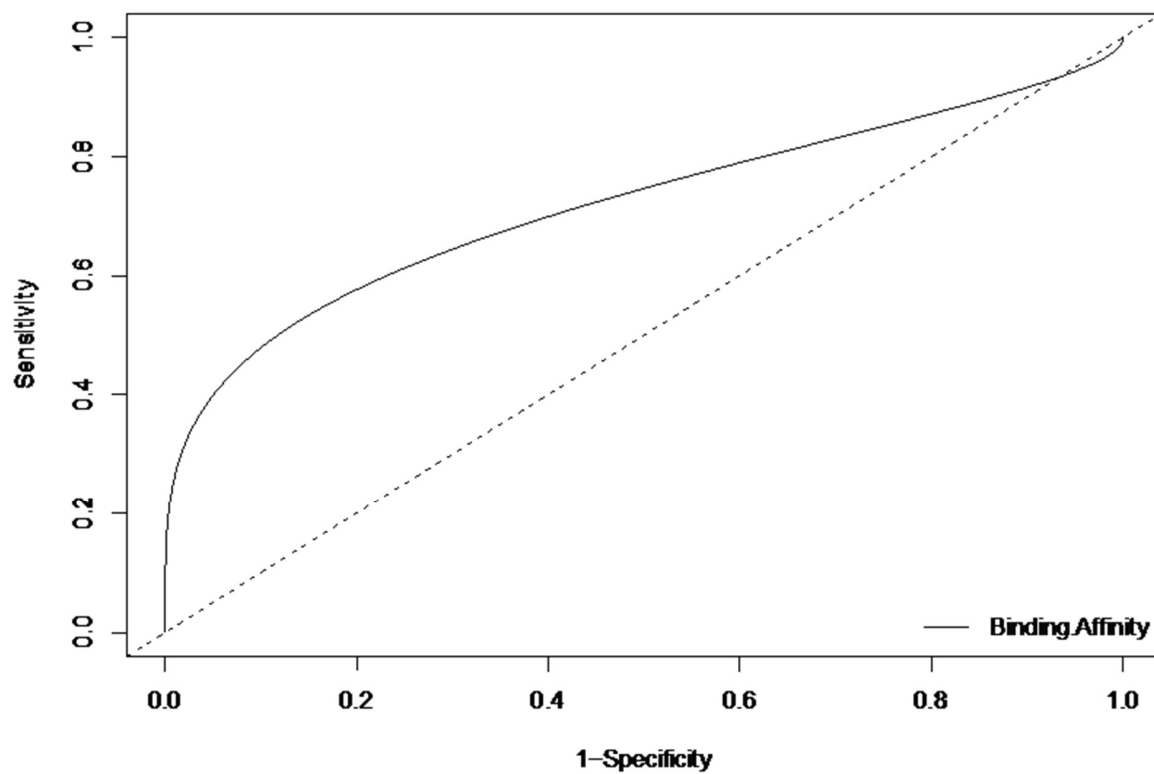

**Figure S1.** Receiver Operator Characteristic (ROC) curve generated after screening active molecules and their decoys against EBOV VP35 protein. The AUC value for the curve was 0.72, indicating the validity of the classification.

A)

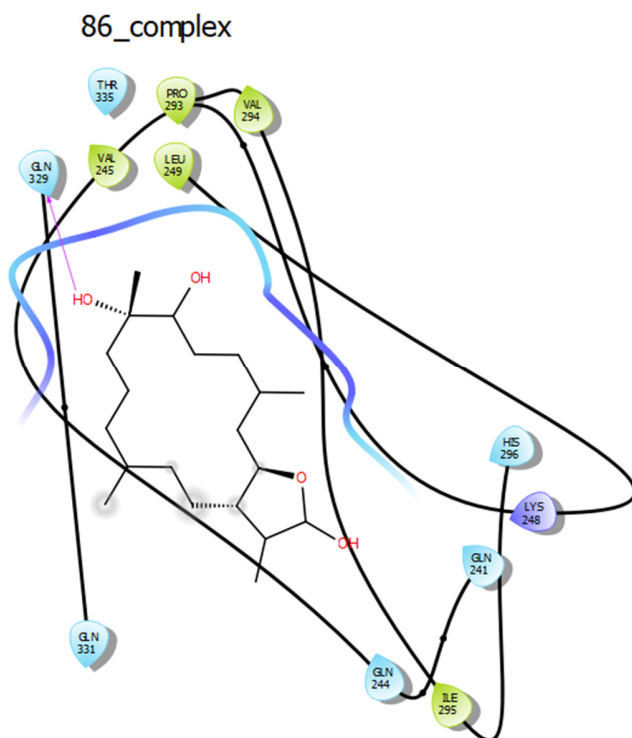

B)

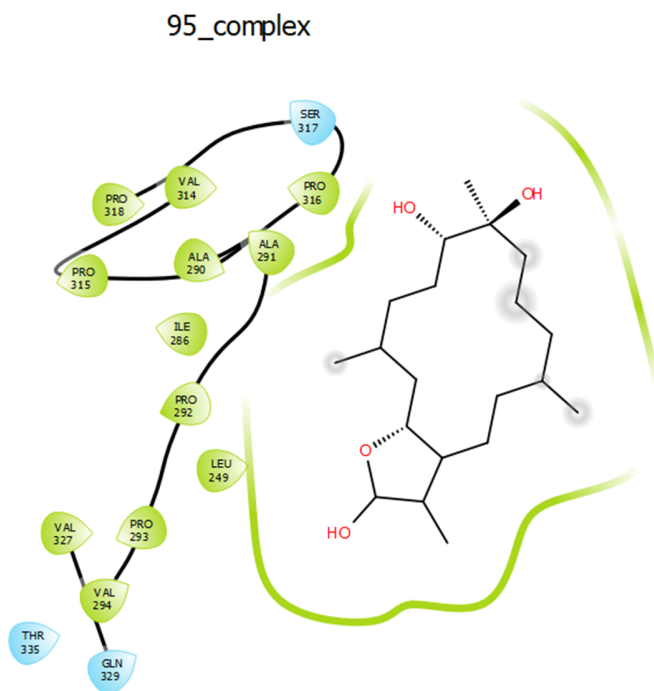

C)

142\_complex

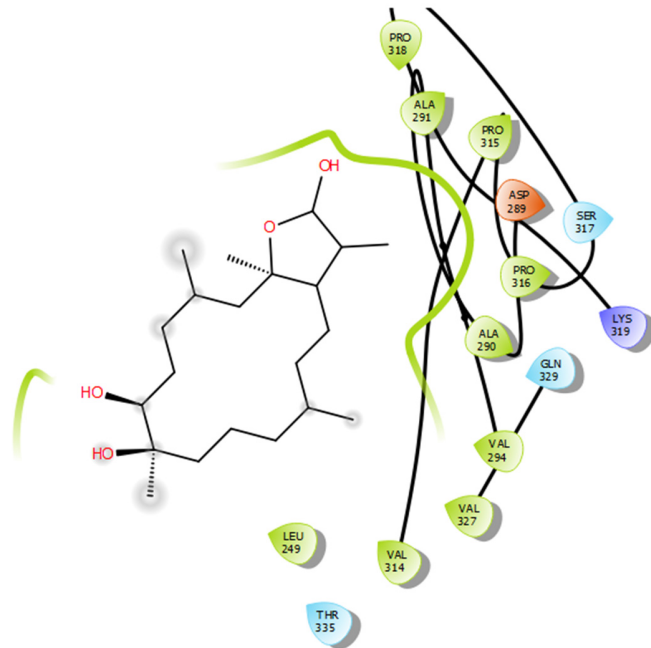

D)

205\_complex

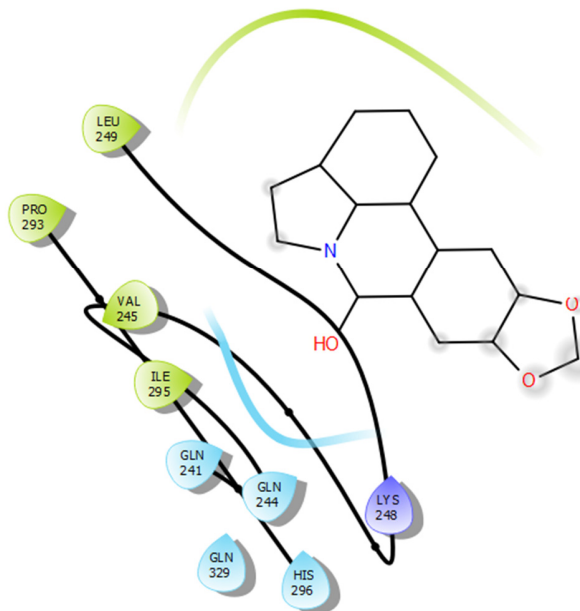

E)

397\_complex

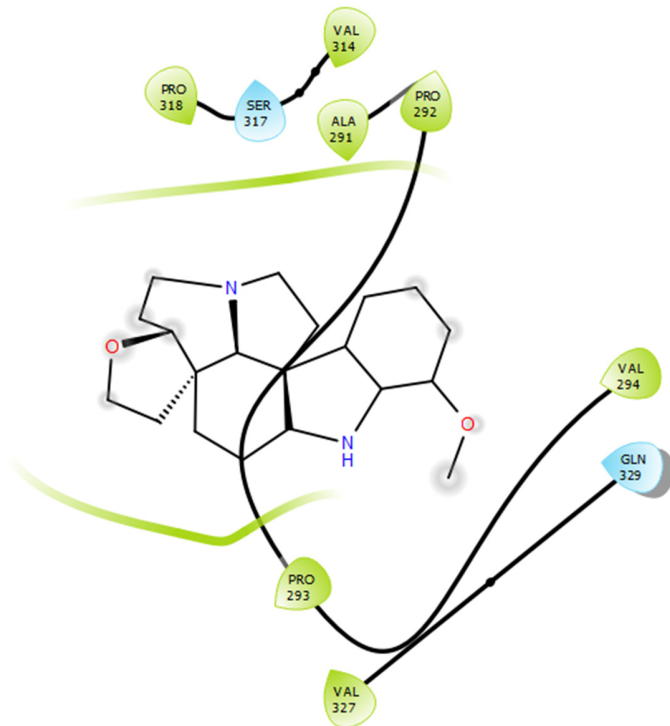

F)

2412\_complex

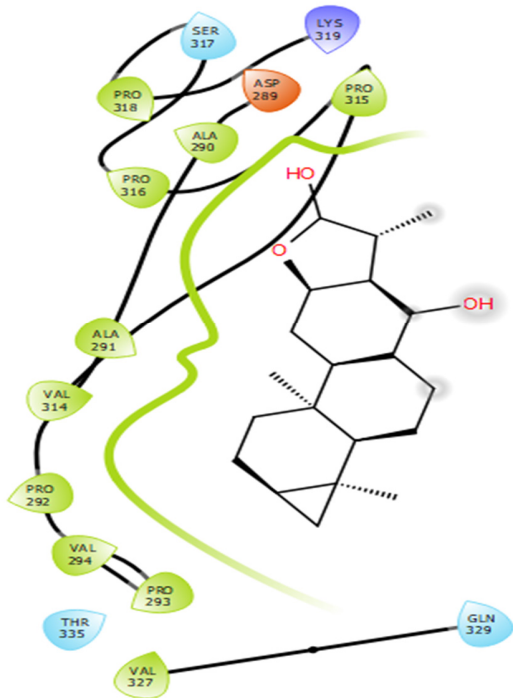

G)

2476\_complex

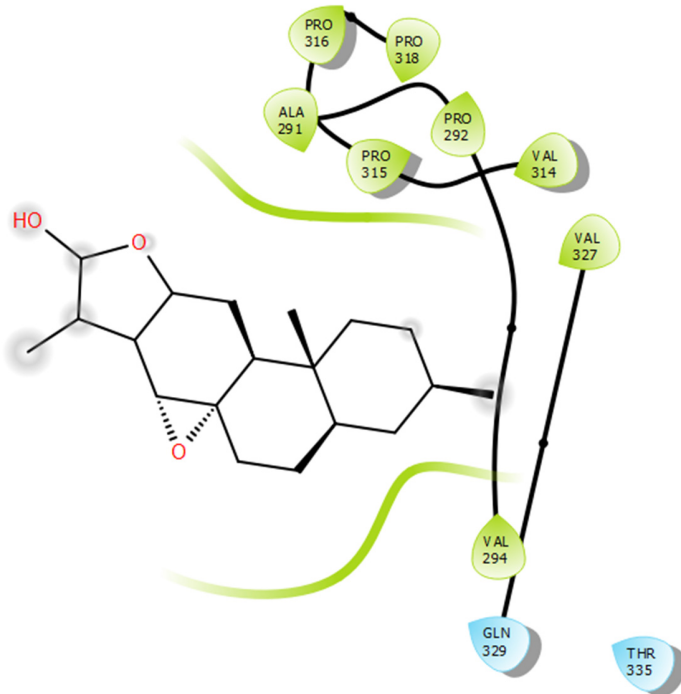

H)

3355\_complex

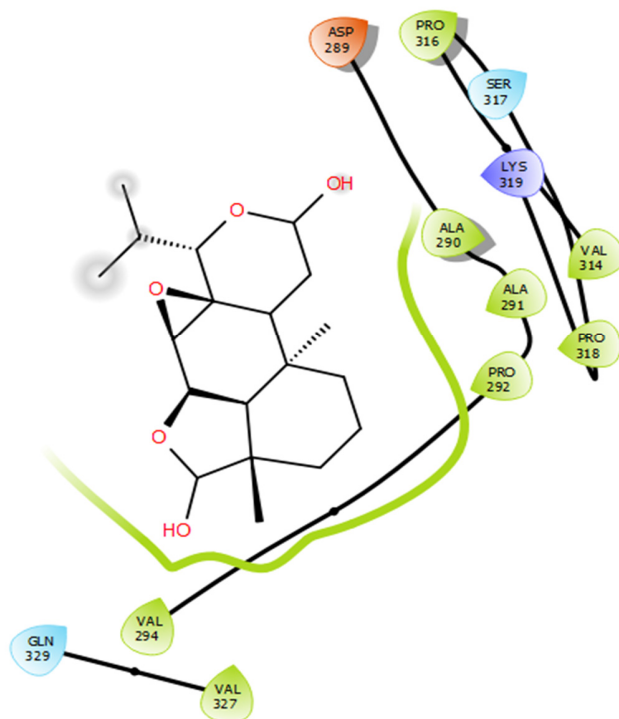

I)

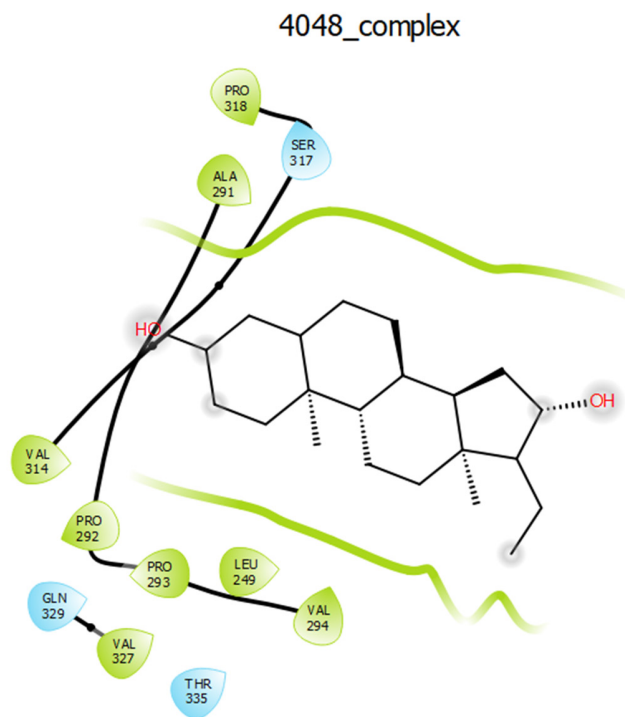

J)

ZINC000014612849\_complex

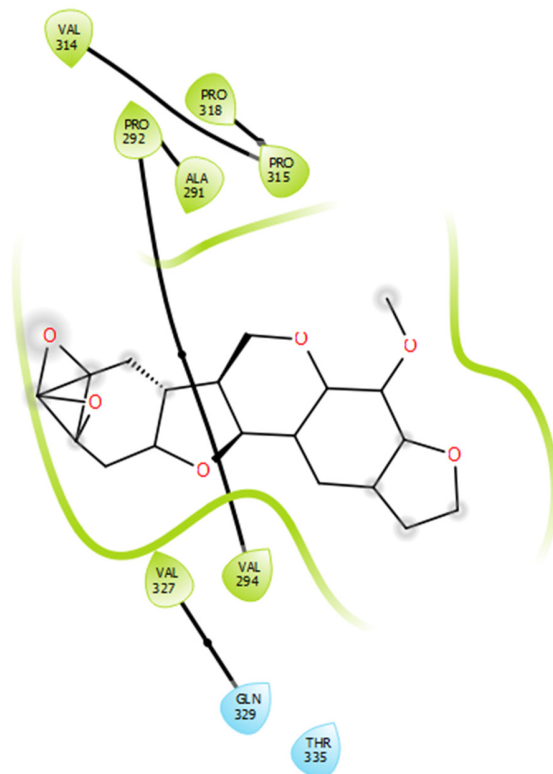

K)

ZINC000033831303\_complex

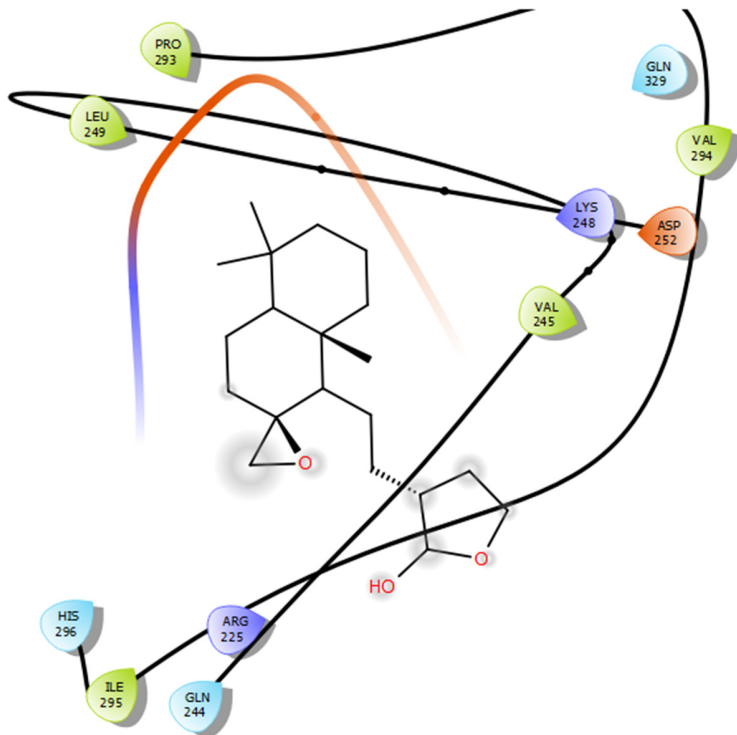

L)

ZINC000095486250\_complex

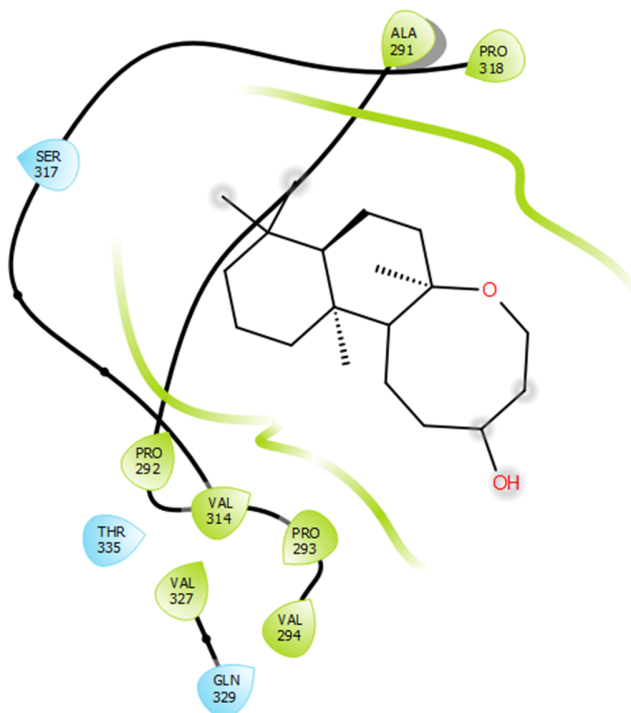

M)

Amodiaquine\_complex

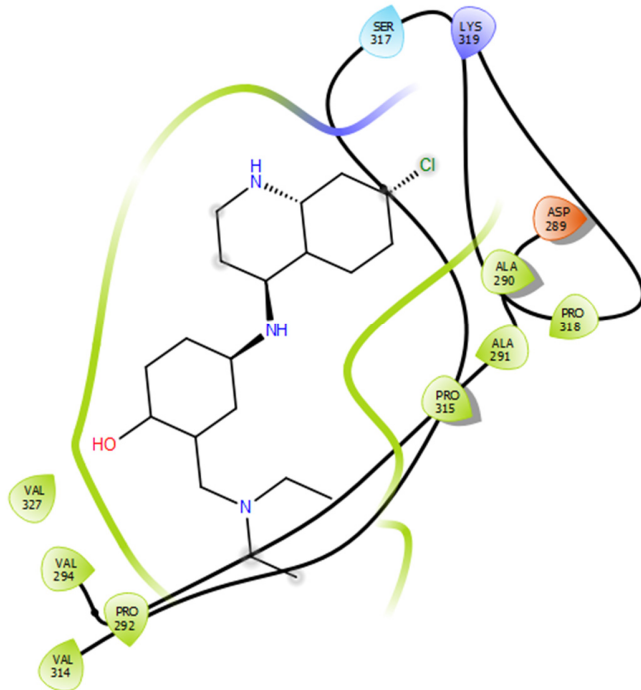

N)

Chloroquine\_complex

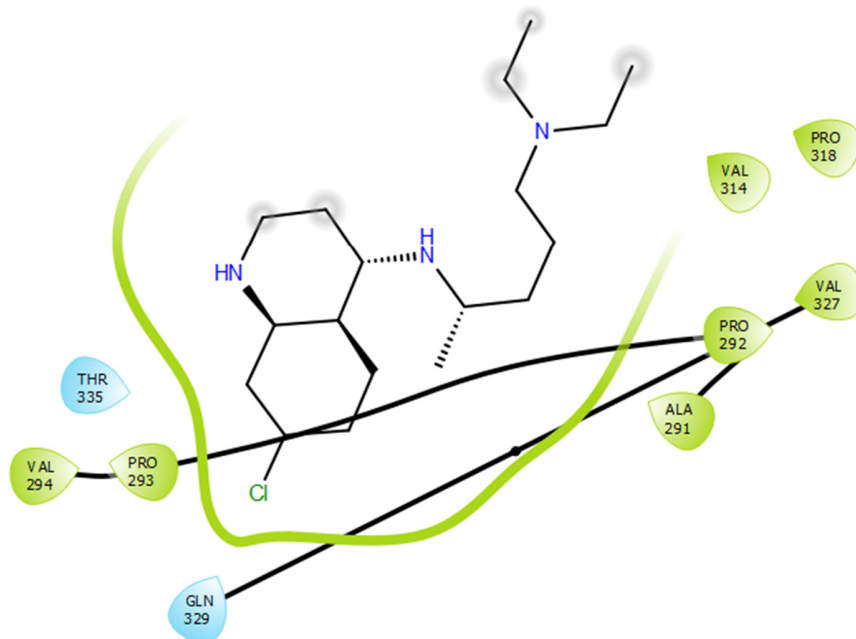



O)

EGCG\_complex

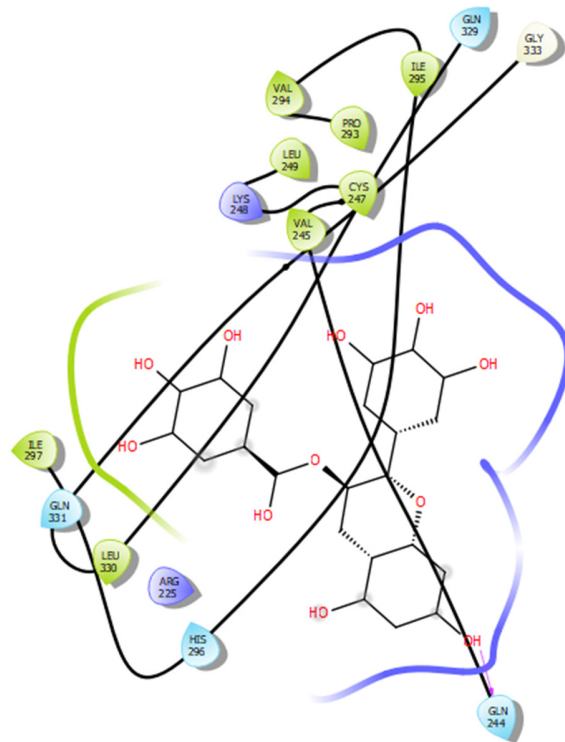

P)

Gossypetin\_complex

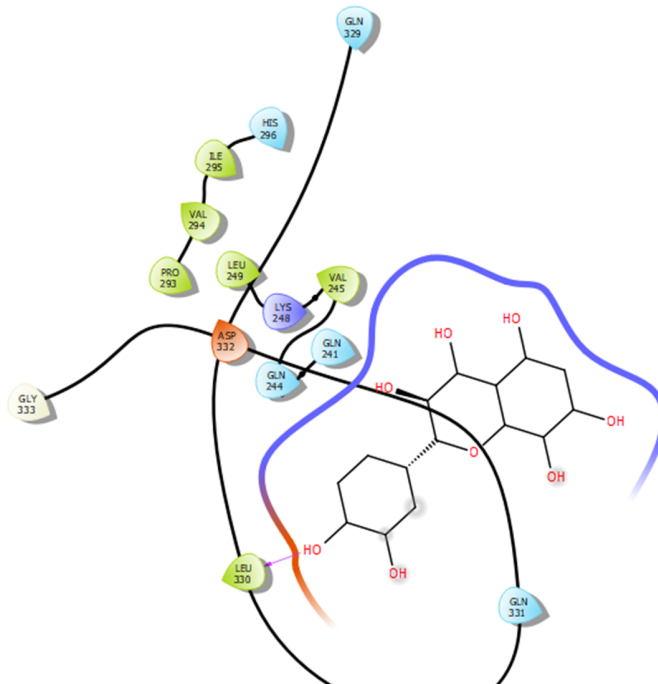

Q)

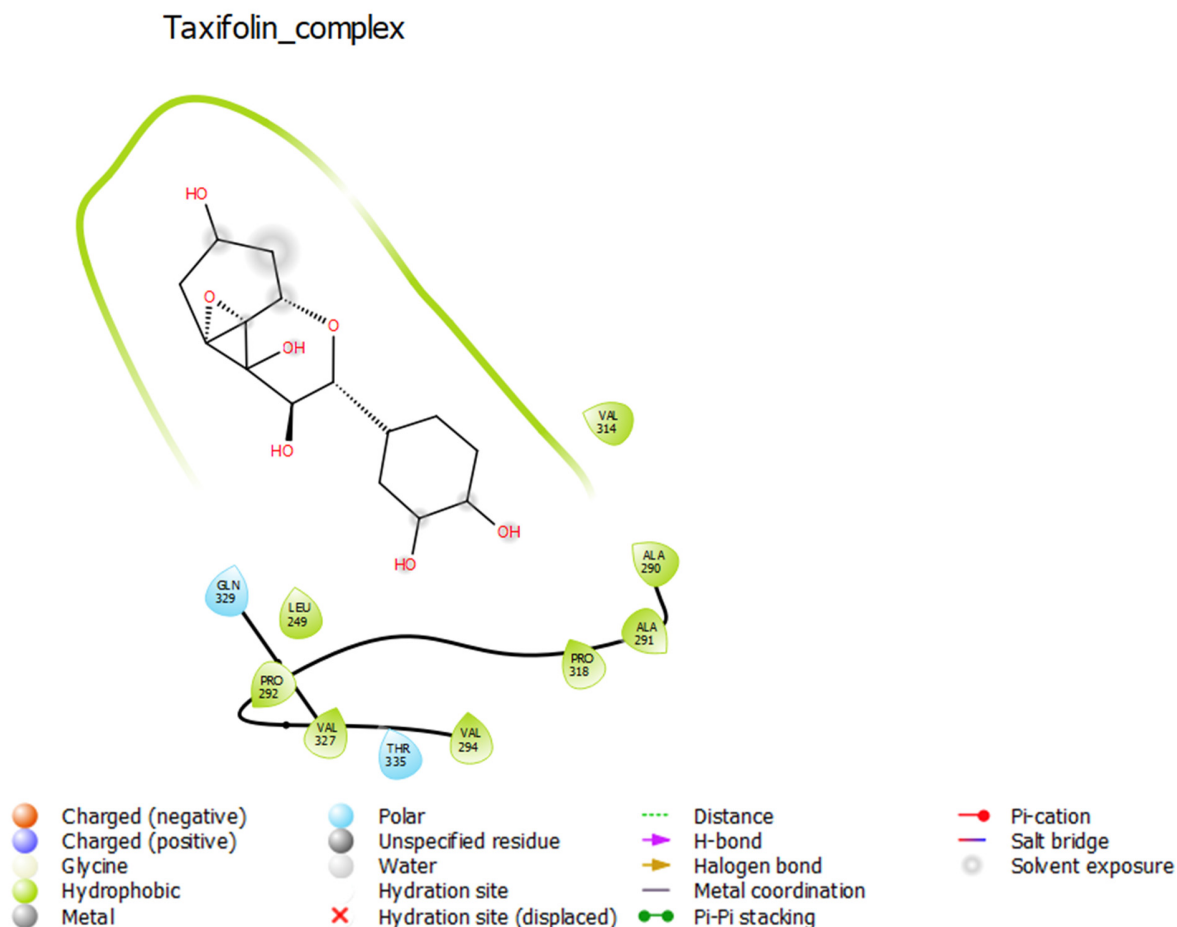

**Figure S2.** 2D diagrams of VP35-ligand complexes showing the hydrogen and hydrophobic interactions with the amino acid residues involved. The hydrogen bond with Gln329 is colored purple. The 2D protein-ligand interaction profile of EBOV VP35 in complex with (A) NANPDB86, (B) NANPDB95, (C) NANPDB142, (D) NANPDB205, (E) NANPDB397, (F) NANPDB2412, (G) NANPDB2476, (H) NANPDB3355, (I) NANPDB4048, (J) ZINC000014612849, (K) ZINC000033831303, (L) ZINC000095486250, (M) Amodiaquine, (N) Chloroquine, (O) EGCG, (P) Gossypetin, and (Q) Taxifolin.

**Table S1.** ADME prediction results of 12 compounds and 5 known inhibitors for Cytochrome P450 (CYP) inhibition.

| Drug ID/Drug name | CYP1A2 | CYP2C19 | CYP2C9 | CYP2D6 | CYP3A4 |
|-------------------|--------|---------|--------|--------|--------|
| NANPDB86          | No     | No      | No     | No     | Yes    |
| NANPDB95          | No     | No      | No     | No     | No     |
| NANPDB142         | No     | No      | Yes    | No     | Yes    |
| NANPDB205         | No     | No      | No     | No     | No     |

|             |     |     |     |     |     |
|-------------|-----|-----|-----|-----|-----|
| NANPDB397   | No  | No  | No  | Yes | Yes |
| NANPDB2412  | No  | No  | Yes | No  | No  |
| NANPDB2476  | No  | No  | Yes | No  | No  |
| NANPDB3355  | No  | No  | No  | No  | No  |
| NANPDB4048  | No  | Yes | Yes | No  | No  |
| Amodiaquine | Yes | Yes | No  | Yes | Yes |
| Chloroquine | Yes | No  | No  | Yes | Yes |
| EGCG        | No  | No  | No  | No  | No  |
| Gossypetin  | Yes | No  | No  | Yes | Yes |
| Taxifolin   | No  | No  | No  | No  | No  |

**A)**

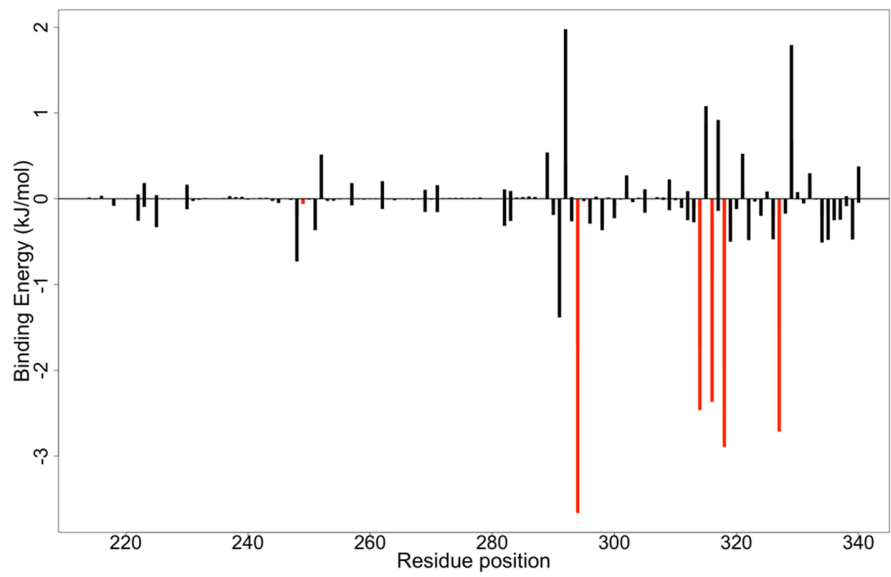

**B)**

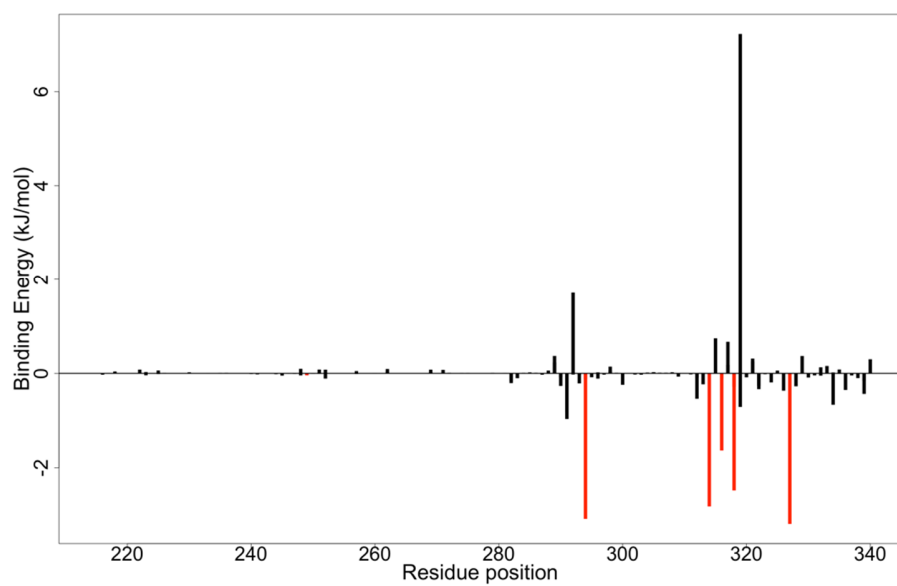

C)

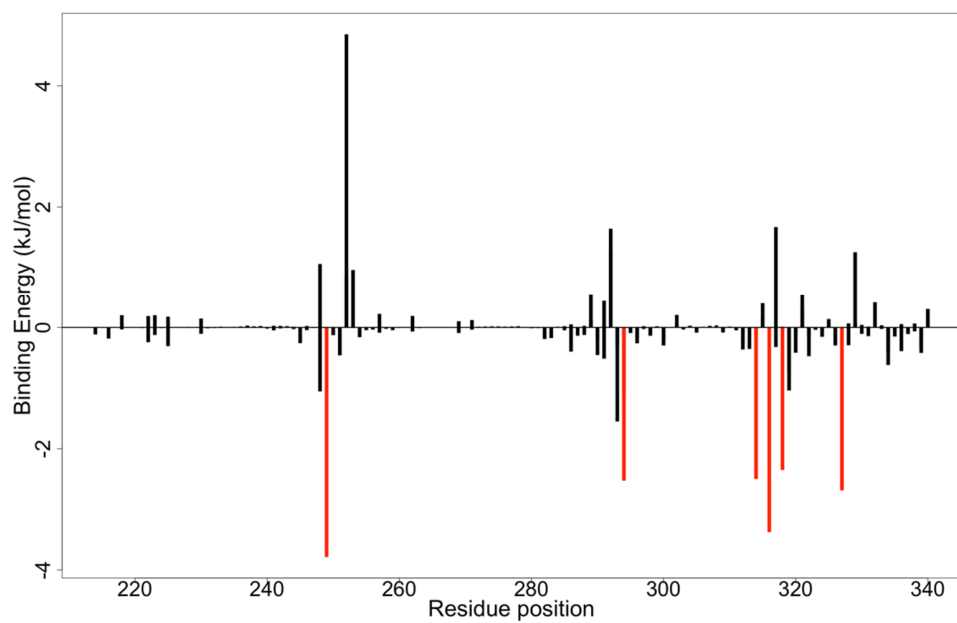

**D)**

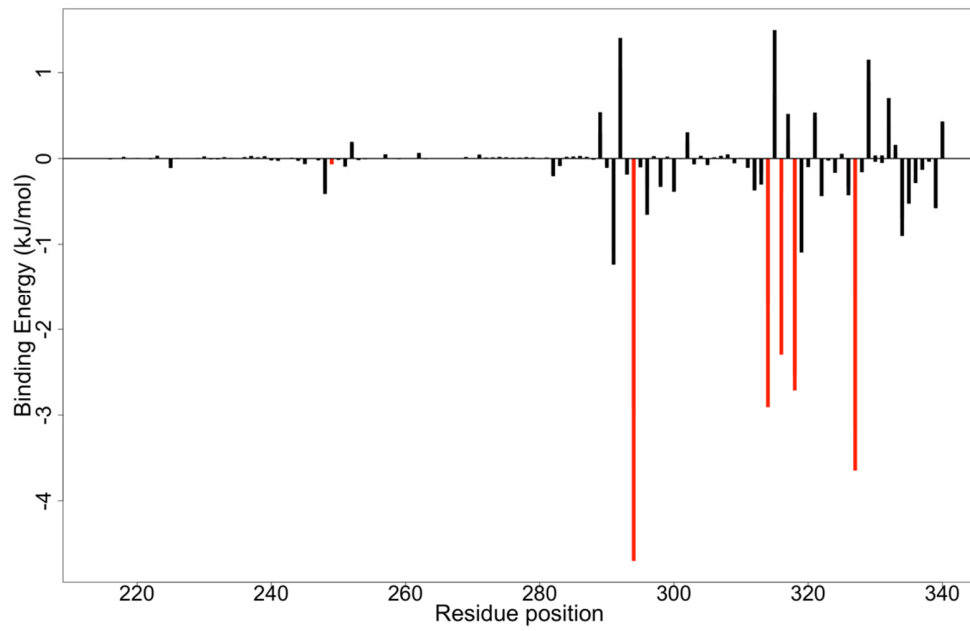

**E)**

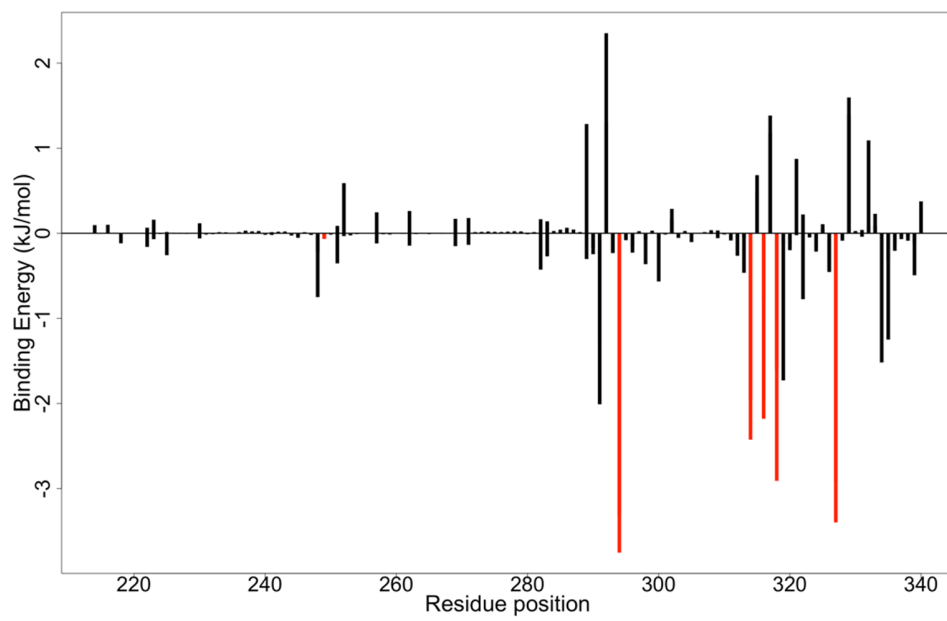

**F)**

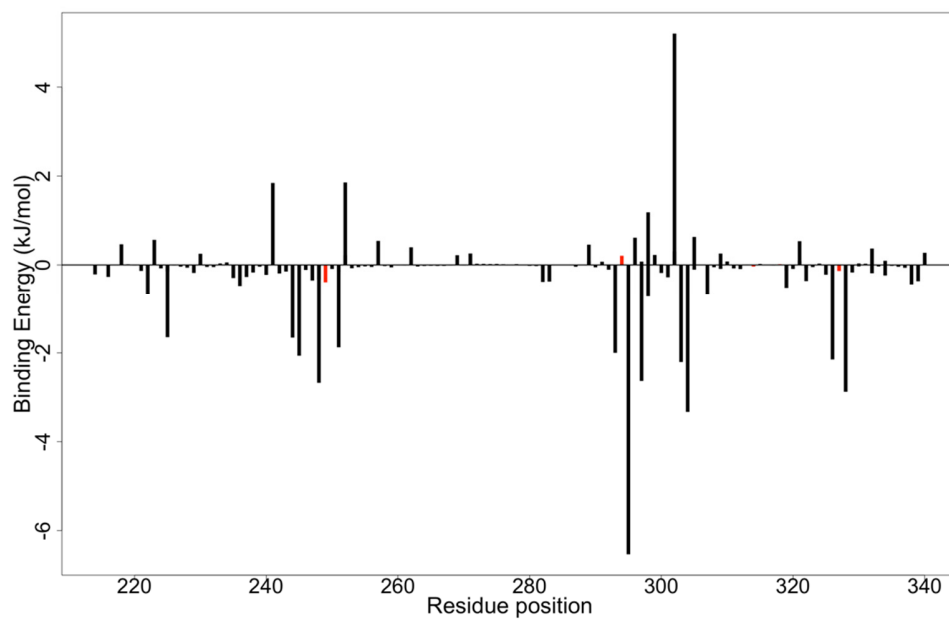

**Figure S3.** Molecular mechanics Poisson-Boltzmann surface area (MM-PBSA) plot of binding free energy contribution per residue of the VP35-ligand complexes: A) NANPDB2412, B) NANPDB2476, C) NANPDB4048, D) ZINC000095486250, E) Amodiaquine, and F) EGCG. Fluctuations by predicted critical residues are shown in red.
